# Supplementary material for: One-step simultaneous liquid phase exfoliation-induced chirality in graphene and their chirality-mediated microRNA delivery
Source: Royal Society of Chemistry journal article supplement (doi:10.1039/d3ma00611e), 2023-01-01
Supplement: d3ma00611e1.pdf [file d3ma00611e1.pdf]

# One-step simultaneous liquid phase exfoliation-induced chirality in graphene and their Chirality-mediated microRNA delivery

Pranav<sup>1,2</sup>, Eswara N.H.K. Ghali<sup>1,2</sup>, Neeraj Chauhan<sup>1,2</sup>, Rahul Tiwari<sup>1,2</sup>, Marco Cabrera<sup>1,2</sup>, Subhash C. Chauhan<sup>1,2</sup>, and Murali M. Yallapu<sup>1,2\*</sup>

<sup>1</sup>Department of Immunology and Microbiology, School of Medicine, University of Texas Rio Grande Valley, McAllen, TX, USA

<sup>2</sup>South Texas Center of Excellence in Cancer Research, School of Medicine, University of Texas Rio Grande Valley, McAllen, TX, USA

\*To whom correspondence should be addressed

**Murali M. Yallapu, Ph.D.**

Associate Professor, Department of Immunology and Microbiology  
Member, South Texas Center of Excellence in Cancer Research  
School of Medicine, University of Texas Rio Grande Valley  
Room 2.249, Biomedical Research Building  
McAllen, TX 78504  
Ph: 956-296-1734  
murali.yallapu@utrgv.edu

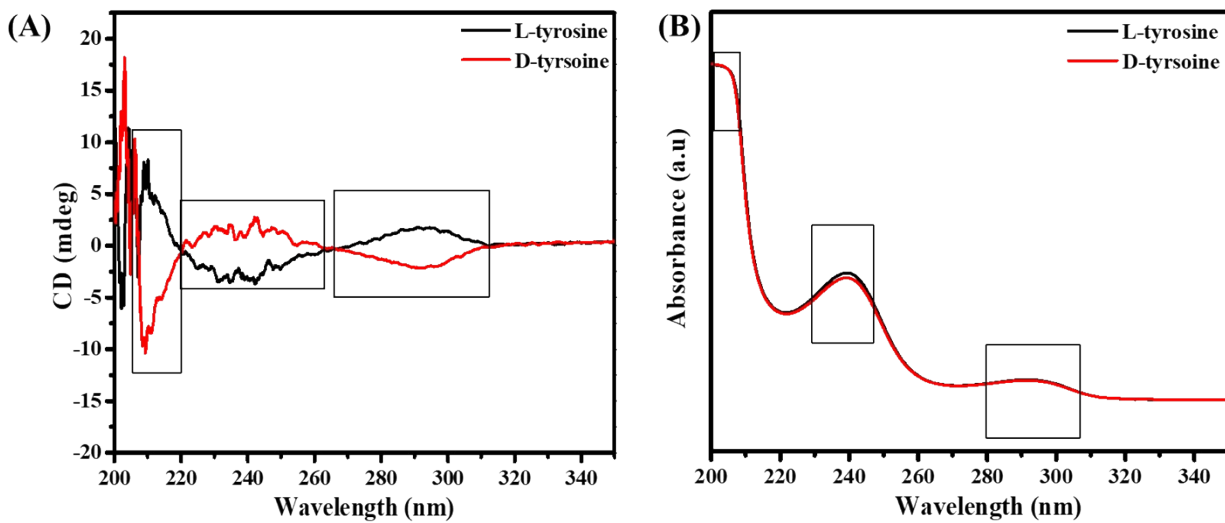

**Figure S1.** (A) CD spectra of L-tyrosine and D-tyrosine and (B) UV absorbance of L-tyrosine and D-tyrosine.

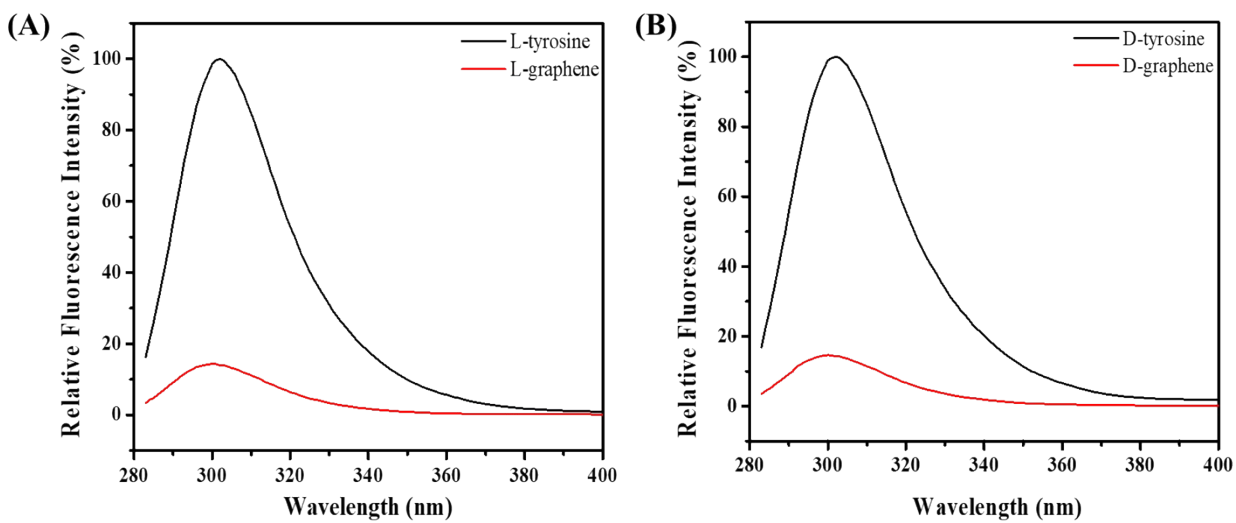

**Figure S2.** Relative fluorescence quenching of (A) L-tyrosine and L-graphene and (B) D-tyrosine and D-graphene.

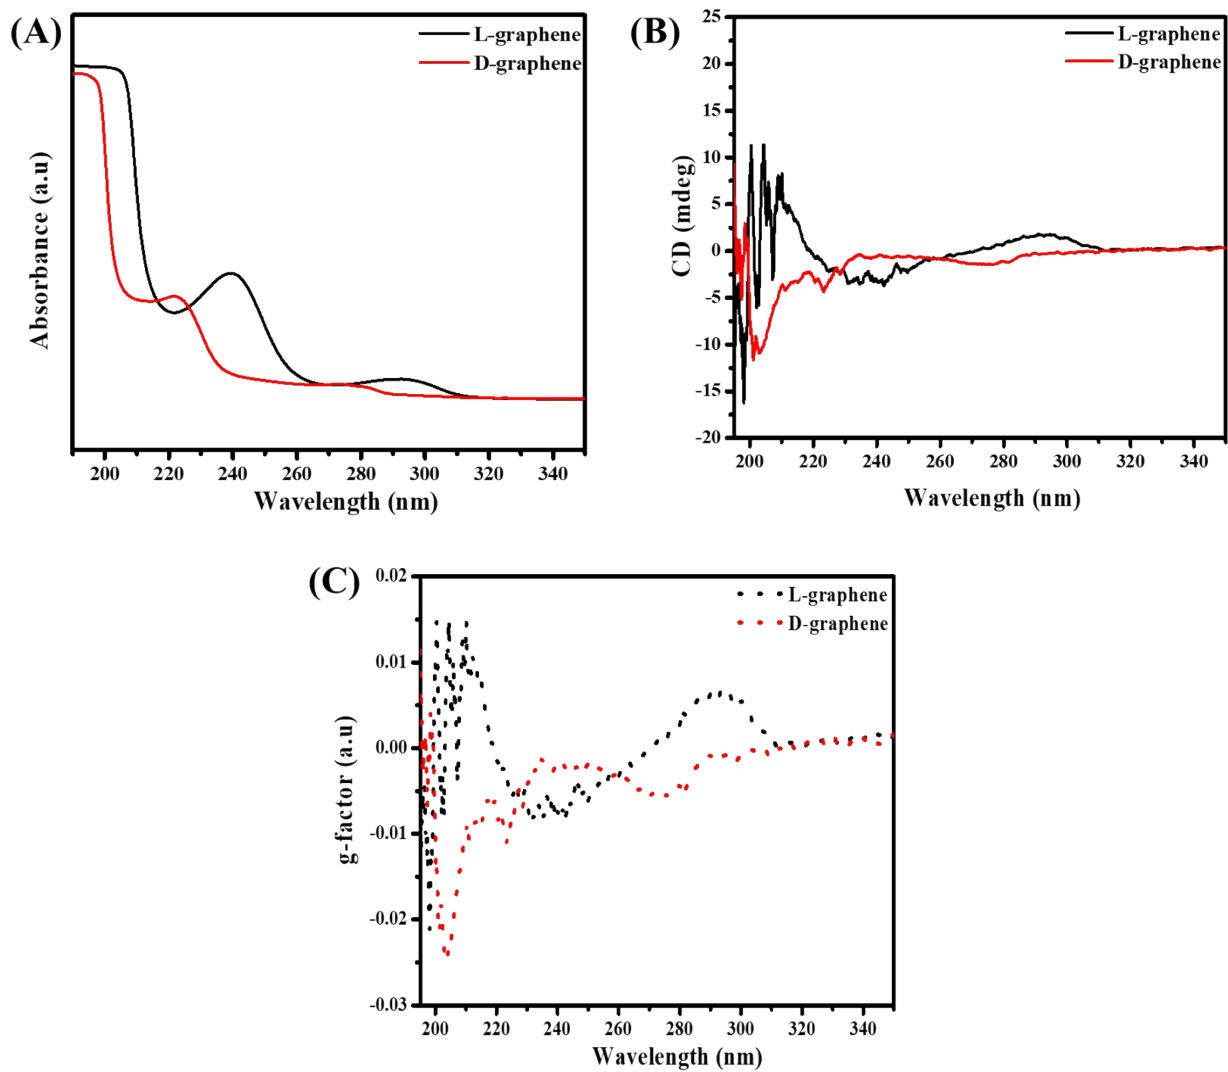

**Figure S3.** (A) UV absorbance of L-graphene and D-graphene, (B) CD spectra of L-graphene and D-graphene, and (C) A symmetry (g-factor) of L-graphene and D-graphene after 30 days.

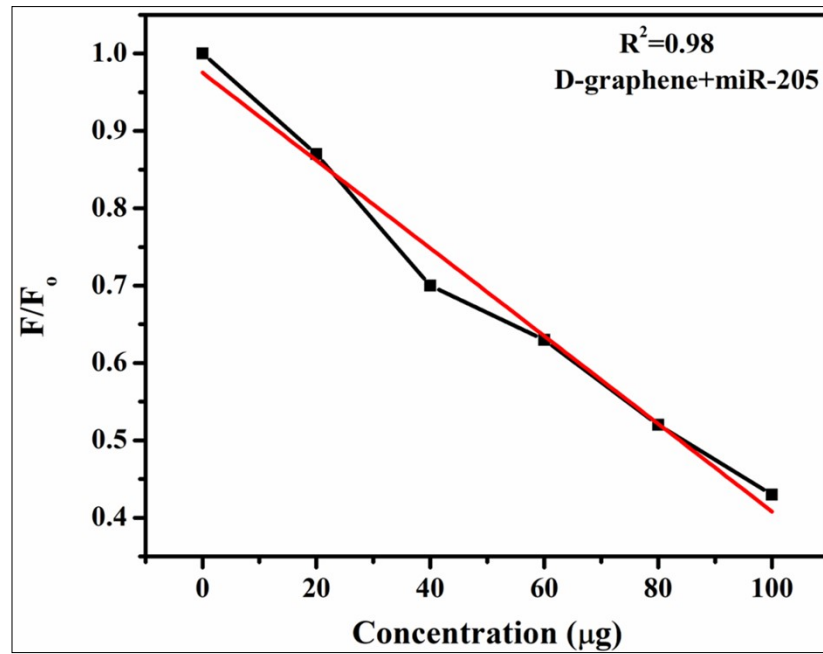

**Figure S4.** The linearity of D-graphene interacted with FAM-miR-205 calculated from fluorescence spectrum of D-graphene with FAM-miR-205.

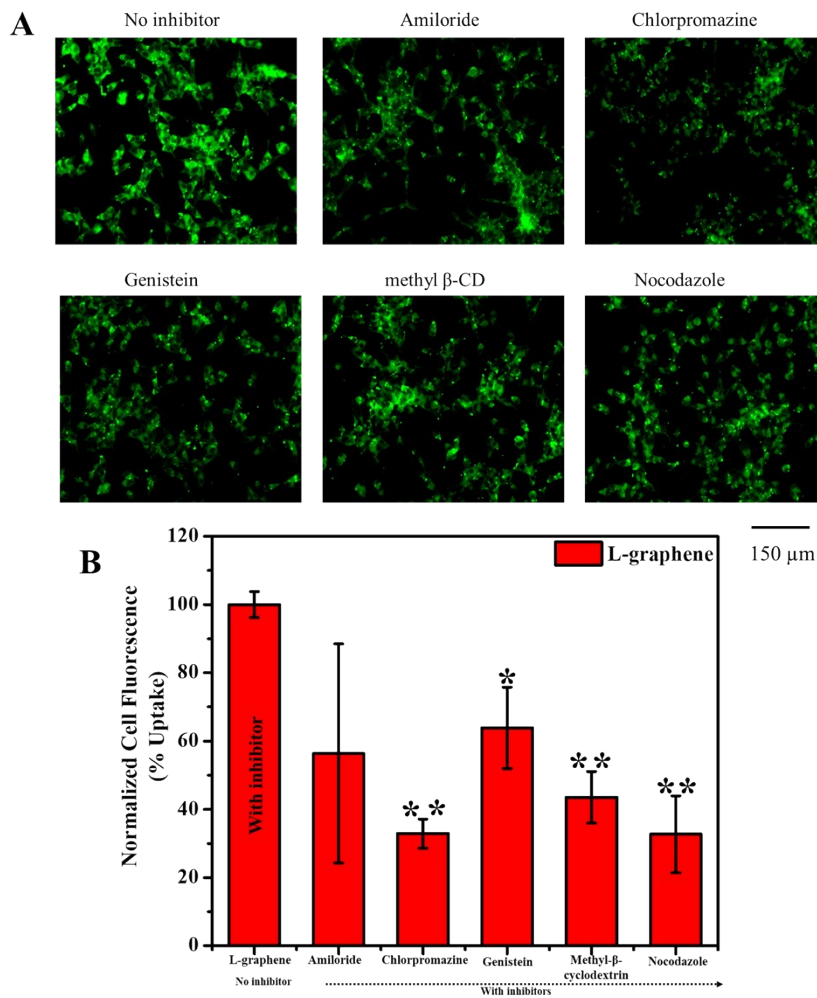

**Figure S5.** Uptake of L-graphene in the presence of inhibitors. Normalized cell fluorescence (% uptake) values of L-graphene in presence of No inhibitors and inhibitors. \* $P < 0.05$ , \*\* $P < 0.01$  vs. No inhibitor.

**Table S1.** EDX composition of L-Graphene and D-Graphene.

| L-graphene |        | D-graphene |       |
|------------|--------|------------|-------|
| Carbon     | 93.98% | Carbon     | 88.61 |
| Nitrogen   | 0.23%  | Nitrogen   | 1.44  |
| Oxygen     | 2.64%  | Oxygen     | 4.36  |

**Table S2:** Hydrodynamic diameter ( $D_H$ ), Polydispersity (PdI) and Zeta Potential (mV) of L-graphene and D-graphene.

| L-graphene                                        | D-graphene                                         |
|---------------------------------------------------|----------------------------------------------------|
| Size-309.43±14.8 nm                               | Size-357.76±4.03 nm                                |
| Size-362.13±6.29 nm (after 30 days)               | Size-346.4±1.08 nm (after 30 days)                 |
| PdI-0.35±0.072                                    | PdI-0.386±0.0005                                   |
| PdI-0.41±0.04 (after 30 days)                     | PdI-0.4±0.03 (after 30 days)                       |
| Zeta Potential - -38.57±0.08 mV                   | Zeta Potential - -37.24±0.33 mV                    |
| Zeta Potential - -28.88±1.2 mV<br>(after 30 days) | Zeta Potential - -29.44±0.29 mV<br>(after 30 days) |
